# Supplementary material for: Overall Survival of Patients with Myxofibrosarcomas: An Epidemiological Study
Source: MDPI journal article supplement (doi:10.3390/cancers14051102), 2022-02-22
Supplement: s1 [file s1]

# Supplementary data: Overall survival of patients with myxofibrosarcomas: an epidemiological study

*Table S1.* Clinical characteristics and OS.

| <u>Variable</u>                                     | <u>No. (%)</u> | <u>Median Overall survival<br/>(months) (95% CI)<sup>1</sup></u> | <u>p-value<sup>2</sup></u> |
|-----------------------------------------------------|----------------|------------------------------------------------------------------|----------------------------|
| <b>Age</b>                                          |                |                                                                  |                            |
| <65 years                                           | 395 (44)       | Median not reached                                               | <0.01 <sup>3</sup>         |
| ≥65 years                                           | 513 (56)       | 80.1 (63.9-96.3)                                                 |                            |
| <b>Sex</b>                                          |                |                                                                  |                            |
| Male                                                | 492 (54)       | 133.9 (106.5-161.2)                                              | 0.025 <sup>3</sup>         |
| Female                                              | 416 (46)       | 194.1 (146.2-241.9)                                              |                            |
| <b>Cancer in medical history</b>                    |                |                                                                  |                            |
| No                                                  | 766 (84)       | 161.8                                                            | <0.01 <sup>3</sup>         |
| Yes                                                 | 142 (16)       | 59.2 (40.2-78.2)                                                 |                            |
| <b>Tumour size</b>                                  |                |                                                                  |                            |
| ≤5 cm                                               | 375 (41)       | Median not reached                                               | <0.01 <sup>3</sup>         |
| >5 cm                                               | 498 (55)       | 89.1 (64.0-114.2)                                                |                            |
| Unknown                                             | 35 (4)         | 126.5 (56.1-196.8)                                               |                            |
| <b>Tumour depth</b>                                 |                |                                                                  |                            |
| Superficial                                         | 420 (46)       | Median not reached                                               | <0.01 <sup>3</sup>         |
| Deep                                                | 267 (29)       | 105.5 (73.3-137.7)                                               |                            |
| Unknown                                             | 221 (24)       | 126.5 (54.2-198.8)                                               |                            |
| <b>Tumour location</b>                              |                |                                                                  |                            |
| Trunk                                               | 183 (20)       | 133.9 (88.0-179.8)                                               | 0.19                       |
| Head & neck                                         | 24 (3)         | 192.4 (102.9-282.0)                                              |                            |
| Extremities                                         | 686 (76)       | 156.6 (126.1-187.2)                                              |                            |
| (Retro)peritoneum                                   | 5 (0.5)        | 20.1 (0.0-51.2)                                                  |                            |
| Other                                               | 10 (1)         | 67.543                                                           |                            |
| <b>Histological grade</b>                           |                |                                                                  |                            |
| I                                                   | 241 (27)       | Median not reached                                               | <0.01 <sup>3</sup>         |
| II                                                  | 188 (21)       | 112.9 (76.3-149.6)                                               |                            |
| III                                                 | 358 (39)       | 89.1 (59.6-118.6)                                                |                            |
| Unknown                                             | 121 (13)       | 133.9 (50.9-216.9)                                               |                            |
| <b>Distant metastasis at diagnosis</b>              |                |                                                                  |                            |
| No                                                  | 791 (87)       | 150.2 (115.2-185.1)                                              | <0.01 <sup>3</sup>         |
| Yes                                                 | 42 (5)         | 12.2 (7.3-17.0)                                                  |                            |
| Unknown                                             | 75 (8)         | Median not reached                                               |                            |
| <b>Surgery</b>                                      |                |                                                                  |                            |
| No                                                  | 71 (8)         | 12.3 (8.2-16.5)                                                  | <0.01 <sup>3</sup>         |
| Yes                                                 | 837 (92)       | 162.3 (140.3-184.3)                                              |                            |
| <b>Residual disease following primary treatment</b> |                |                                                                  |                            |
| R0                                                  | 539 (59)       | Median not reached                                               | <0.01 <sup>3</sup>         |
| R1                                                  | 164 (18)       | 104.4 (81.4-127.4)                                               |                            |
| R2                                                  | 13 (1)         | 50.6 (36.3-65.0)                                                 |                            |
| Unknown/no surgery                                  | 192 (21)       | 77.1 (11.1-143.1)                                                |                            |
| <b>Radiotherapy</b>                                 |                |                                                                  |                            |
| No                                                  | 382 (42)       | 160.4                                                            | <0.01 <sup>3</sup>         |
| Neoadjuvant                                         | 188 (21)       | 116.1 (95.8-136.4)                                               |                            |
| Adjuvant                                            | 291 (32)       | 161.8 (132.7-190.8)                                              |                            |
| Neoadjuvant + adjuvant                              | 19 (2)         | Median not reached                                               |                            |
| Primary                                             | 28 (3)         | 20.6 (4.4-36.9)                                                  |                            |

| Diagnosis      |          |                     |                   |
|----------------|----------|---------------------|-------------------|
| Sarcoma centre | 183 (20) | 194.1 (96.6-291.5)  | 0.15              |
| Other          | 725 (80) | 146.8 (124.8-168.8) |                   |
| Surgery        |          |                     |                   |
| Sarcoma centre | 412 (45) | 156.8 (135.4-178.2) | 0.02 <sup>3</sup> |
| Other          | 480 (53) | 126.0 (95.1-156.8)  |                   |
| Unknown        | 16 (2)   | 192.4               |                   |

<sup>1</sup> CI (confidence interval) <sup>2</sup> log-rank test <sup>3</sup> p<0.05.

**Table S2.** Patient and clinical characteristics of the 177 patients whose recurrence status was available.

| <b>Variables</b>                                    | <b>No. (%)</b> |
|-----------------------------------------------------|----------------|
| <b>Age</b>                                          |                |
| Median age (range)                                  | 66 (22-92)     |
| <b>Sex</b>                                          |                |
| Male                                                | 88 (50)        |
| Female                                              | 89 (50)        |
| <b>Cancer in medical history</b>                    |                |
| No                                                  | 152 (86)       |
| Yes                                                 | 25 (14)        |
| <b>Tumour size</b>                                  |                |
| ≤5 cm                                               | 77 (44)        |
| >5 cm                                               | 93 (52)        |
| Unknown                                             | 7 (4)          |
| <b>Tumour depth</b>                                 |                |
| Superficial                                         | 92 (52)        |
| Deep                                                | 53 (30)        |
| Unknown                                             | 32 (18)        |
| <b>Myxofibrosarcoma localization</b>                |                |
| Trunk                                               | 30 (17)        |
| Head and neck                                       | 4 (2)          |
| Extremities                                         | 140 (79)       |
| Mediastinum/heart/pleura                            | 1 (0.6)        |
| Specific organ                                      | 2 (1)          |
| <b>Sarcoma grading</b>                              |                |
| I                                                   | 51 (29)        |
| II                                                  | 32 (18)        |
| III                                                 | 70 (39)        |
| Unknown                                             | 24 (14)        |
| <b>Distant metastases at diagnosis</b>              |                |
| No                                                  | 165 (93)       |
| Yes                                                 | 5 (3)          |
| Unknown                                             | 7 (4)          |
| <b>Surgery</b>                                      |                |
| No                                                  | 8 (5)          |
| Yes                                                 | 169 (96)       |
| <b>Residual disease following primary treatment</b> |                |
| R0                                                  | 105 (59)       |
| R1                                                  | 40 (23)        |
| R2                                                  | 2 (1)          |
| RX                                                  | 30 (17)        |
| <b>Radiotherapy</b>                                 |                |
| No                                                  | 94 (53)        |

|                        |         |
|------------------------|---------|
| Neoadjuvant            | 17 (10) |
| Adjuvant               | 61 (34) |
| Neoadjuvant + adjuvant | 3 (2)   |
| Primary                | 2 (1)   |

**Table S3.** Clinical characteristics and local recurrence and distant metastasis free survival of the 177 patients whose recurrence status was available.

| <u>Variables</u>                                    | <u>No. (%)</u> | <u>Median Local Recurrence free survival (months) (95% CI<sup>1</sup>)</u> | <u>p-value<sup>2</sup></u> | <u>Median Distant metastasis free survival (months) (95% CI<sup>1</sup>)</u> | <u>p-value<sup>2</sup></u> |
|-----------------------------------------------------|----------------|----------------------------------------------------------------------------|----------------------------|------------------------------------------------------------------------------|----------------------------|
| <b>Age</b>                                          |                |                                                                            |                            |                                                                              |                            |
| <65 years                                           | 78 (44)        | 194.1 (1.9-386.2)                                                          | <0.01 <sup>3</sup>         | 194.054                                                                      | <0.01 <sup>3</sup>         |
| ≥65 years                                           | 99 (56)        | 25.1 (17.3-32.9)                                                           |                            | 40.8 (31.9-49.7)                                                             |                            |
| <b>Sex</b>                                          |                |                                                                            |                            |                                                                              |                            |
| Male                                                | 88 (50)        | 34.4 (27.0-41.8)                                                           | 0.12                       | 58 (33.0-83.4)                                                               | 0.194                      |
| Female                                              | 89 (50)        | 53.9 (17.4-90.4)                                                           |                            | 110.5 (64.7-156.3)                                                           |                            |
| <b>Cancer in medical history</b>                    |                |                                                                            |                            |                                                                              |                            |
| No                                                  | 152 (86)       | 37.8 (28.6-47.1)                                                           | 0.368                      | 84.9 (35.5-134.3)                                                            | 0.232                      |
| Yes                                                 | 25 (14)        | 41.4 (33.6-49.2)                                                           |                            | 40.8 (34.2-47.4)                                                             |                            |
| <b>Tumour size</b>                                  |                |                                                                            |                            |                                                                              |                            |
| ≤5 cm                                               | 77 (44)        | 85.8 (34.6-137.0)                                                          | <0.01 <sup>3</sup>         | 194.1 (92.3-295.8)                                                           | <0.01 <sup>3</sup>         |
| >5 cm                                               | 93 (52)        | 34.0 (23.6-44.3)                                                           |                            | 39.8 (24.2-55.5)                                                             |                            |
| Unknown                                             | 7 (4)          | 44.8 (0-135.3)                                                             |                            | 37.0 (0.0-75.5)                                                              |                            |
| <b>Tumour depth</b>                                 |                |                                                                            |                            |                                                                              |                            |
| Superficial                                         | 92 (52)        | 38.9 (30.6-47.3)                                                           | 0.778                      | 103.5 (57.2-149.9)                                                           | 0.060                      |
| Deep                                                | 53 (30)        | 36.7 (14.6-58.9)                                                           |                            | 39.8 (13.6-66.0)                                                             |                            |
| Unknown                                             | 32 (18)        | 44.8 (19.7-69.7)                                                           |                            | 56.5 (0.0-187.1)                                                             |                            |
| <b>Myxofibrosarcoma localization</b>                |                |                                                                            |                            |                                                                              |                            |
| Trunk                                               | 30 (17)        | 25.1 (8.4-41.8)                                                            | 0.106                      | 43.1 (32.7-53.5)                                                             | 0.443                      |
| Extremities                                         | 140 (79)       | 41.4 (26.1-56.7)                                                           |                            | 77.4 (41.8-113.0)                                                            |                            |
| Other                                               | 7 (4)          | Median not reached                                                         |                            | Median not reached                                                           |                            |
| <b>Sarcoma grading</b>                              |                |                                                                            |                            |                                                                              |                            |
| I                                                   | 51 (29)        | Median not reached                                                         | <0.01 <sup>3</sup>         | Median not reached                                                           | <0.01 <sup>3</sup>         |
| II                                                  | 32 (18)        | 34.4 (13.5-55.3)                                                           |                            | 43.1 (0.0-96.9)                                                              |                            |
| III                                                 | 70 (39)        | 22.4 (17.0-27.9)                                                           |                            | 23.4 (14.4-32.3)                                                             |                            |
| Unknown                                             | 24 (14)        | 50.1 (27.6-72.5)                                                           |                            | 155.0                                                                        |                            |
| <b>Distant metastases at diagnosis</b>              |                |                                                                            |                            |                                                                              |                            |
| No                                                  | 165 (93)       | 41.2 (29.5-53.0)                                                           | 0.044                      | 85.2 (40.5-129.9)                                                            | 0.044                      |
| Yes                                                 | 5 (3)          | 41.7 (0.0-114.4)                                                           |                            | 15.1 (0.0-30.8)                                                              |                            |
| Unknown                                             | 7 (4)          | 17.3 (5.7-28.8)                                                            |                            | 39.3 (0.0-134.4)                                                             |                            |
| <b>Surgery</b>                                      |                |                                                                            |                            |                                                                              |                            |
| No                                                  | 8 (5)          | 9.5 (2.9-16.2)                                                             | 0.023                      | 13.3 (0.0-38.3)                                                              | <0.01 <sup>3</sup>         |
| Yes                                                 | 169 (96)       | 41.4 (30.1-52.7)                                                           |                            | 85.2 (42.4-127.9)                                                            |                            |
| <b>Residual disease following primary treatment</b> |                |                                                                            |                            |                                                                              |                            |
| R0                                                  | 105 (59)       | 47.635 (19.6-75.7)                                                         | 0.108                      | 85.2                                                                         | 0.072                      |
| R1/R2                                               | 42 (24)        | 22.8 (20.7-47.6)                                                           |                            | 50.1 (26.7-73.5)                                                             |                            |
| RX                                                  | 30 (17)        | 40.3 (22.5-58.1)                                                           |                            | 162.3 (67.8-256.8)                                                           |                            |
| <b>Radiotherapy</b>                                 |                |                                                                            |                            |                                                                              |                            |
| No                                                  | 94 (53)        | 41.4 (27.1-55.7)                                                           | <0.01 <sup>3</sup>         | Median not reached                                                           | <0.01 <sup>3</sup>         |
| Neoadjuvant                                         | 17 (10)        | 22.4 (4.7-40.2)                                                            |                            | 23.4 (10.2-36.5)                                                             |                            |
| Adjuvant                                            | 61 (34)        | 38.9 (24.5-53.4)                                                           |                            | 41.2 (20.1-62.2)                                                             |                            |

|                           |       |                    |                    |
|---------------------------|-------|--------------------|--------------------|
| Neoadjuvant +<br>adjuvant | 3 (2) | Median not reached | Median not reached |
| Primary                   | 2 (1) | 2.6                | 2.6                |

<sup>1</sup> CI (confidence interval) <sup>2</sup> log-rank test <sup>3</sup> p < 0.05.

**Table S4.** Multivariable analysis on local recurrence and distant metastasis free survival with imputed data.

| <u>Variables</u>          | <u>Local Recurrence free survival</u> |                             |                            | <u>Distant metastasis free survival</u> |                             |                            |
|---------------------------|---------------------------------------|-----------------------------|----------------------------|-----------------------------------------|-----------------------------|----------------------------|
|                           | <u>Hazard Ratio</u>                   | <u>CI (95%)<sup>1</sup></u> | <u>p-value<sup>2</sup></u> | <u>Hazard Ratio</u>                     | <u>CI (95%)<sup>1</sup></u> | <u>p-value<sup>2</sup></u> |
| <b>Age</b>                |                                       |                             |                            |                                         |                             |                            |
| <65 years                 | Ref.                                  | Ref.                        |                            | Ref.                                    | Ref.                        |                            |
| ≥65 years                 | 2.4                                   | 1.6-3.8                     | <0.01 <sup>3</sup>         | 2.7                                     | 1.6-4.5                     | <0.01 <sup>3</sup>         |
| <b>Tumour size</b>        |                                       |                             |                            |                                         |                             |                            |
| <5 cm                     | Ref.                                  | Ref.                        |                            | Ref.                                    | Ref.                        |                            |
| ≥5 cm                     | 2.1                                   | 1.4-3.3                     | <0.01 <sup>3</sup>         | 2.6                                     | 1.6-4.2                     | <0.01 <sup>3</sup>         |
| <b>Histological grade</b> |                                       |                             |                            |                                         |                             |                            |
| I                         | Ref.                                  | Ref.                        |                            | Ref.                                    | Ref.                        |                            |
| II                        | 2.5                                   | 1.2-5.1                     | 0.01 <sup>3</sup>          | 3.5                                     | 1.6-7.6                     | <0.01 <sup>3</sup>         |
| III                       | 3.2                                   | 1.4-7.5                     | 0.01 <sup>3</sup>          | 4.6                                     | 2.2-10.5                    | <0.01 <sup>3</sup>         |
| <b>Radiotherapy</b>       |                                       |                             |                            |                                         |                             |                            |
| No                        | Ref.                                  | Ref.                        |                            | Ref.                                    | Ref.                        |                            |
| Neoadjuvant               | 0.5                                   | 0.2-1.0                     | 0.045 <sup>3</sup>         | 1.1                                     | 0.5-2.3                     | 0.79                       |
| Adjuvant                  | 0.4                                   | 0.2-0.7                     | <0.01 <sup>3</sup>         | 0.7                                     | 0.4-1.3                     | 0.25                       |

<sup>1</sup> CI (confidence interval) <sup>2</sup> log-rank test <sup>3</sup> p < 0.05.
